# Supplementary material
Source: Royal Society of Chemistry journal article supplement (doi:10.1039/d5cy01613d)
Supplement: d5cy01613d1.pdf [file d5cy01613d1.pdf]

## Supplementary Information

Thermally treated polyvinyl chloride (PVC)-derived highly microporous carbon support:  
Applications for hydrotreating catalysis

Table of contents

Fig. S1 Schematic illustration of KOH activation processes for PVC residues.

Fig. S2 Thermogravimetry results of fresh and spent catalysts.

Fig. S3 Differential thermogravimetry results of fresh and spent catalysts.

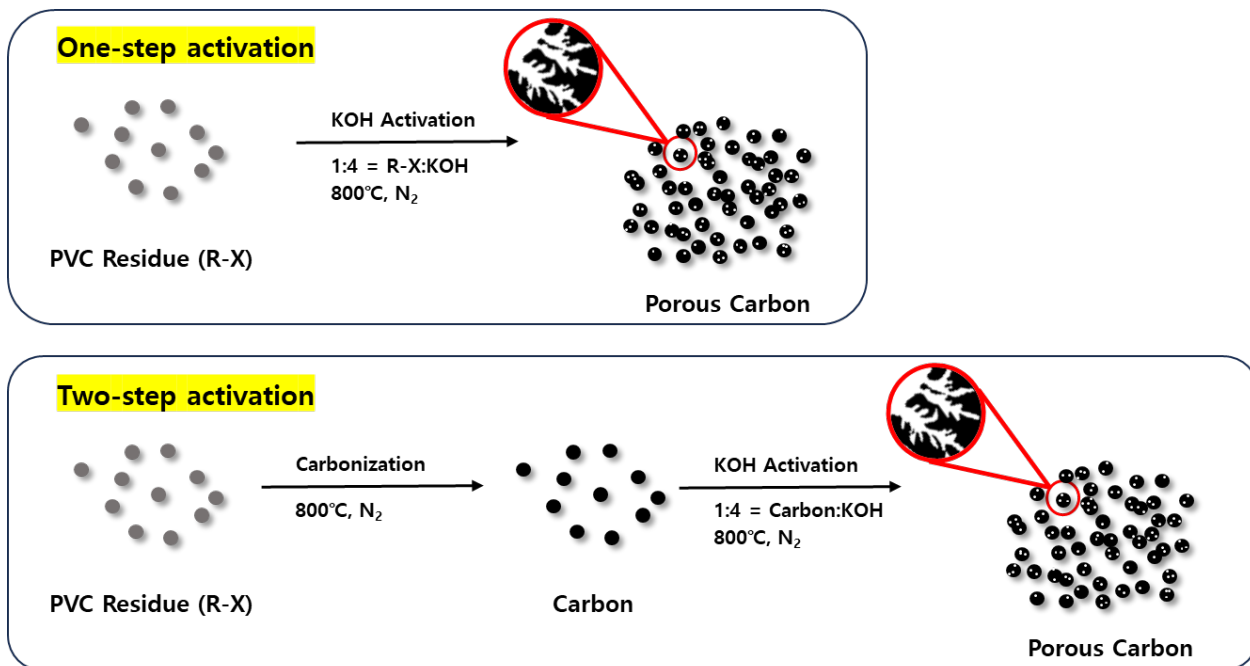

Fig. S1 Schematic illustration of KOH activation processes for PVC residues.

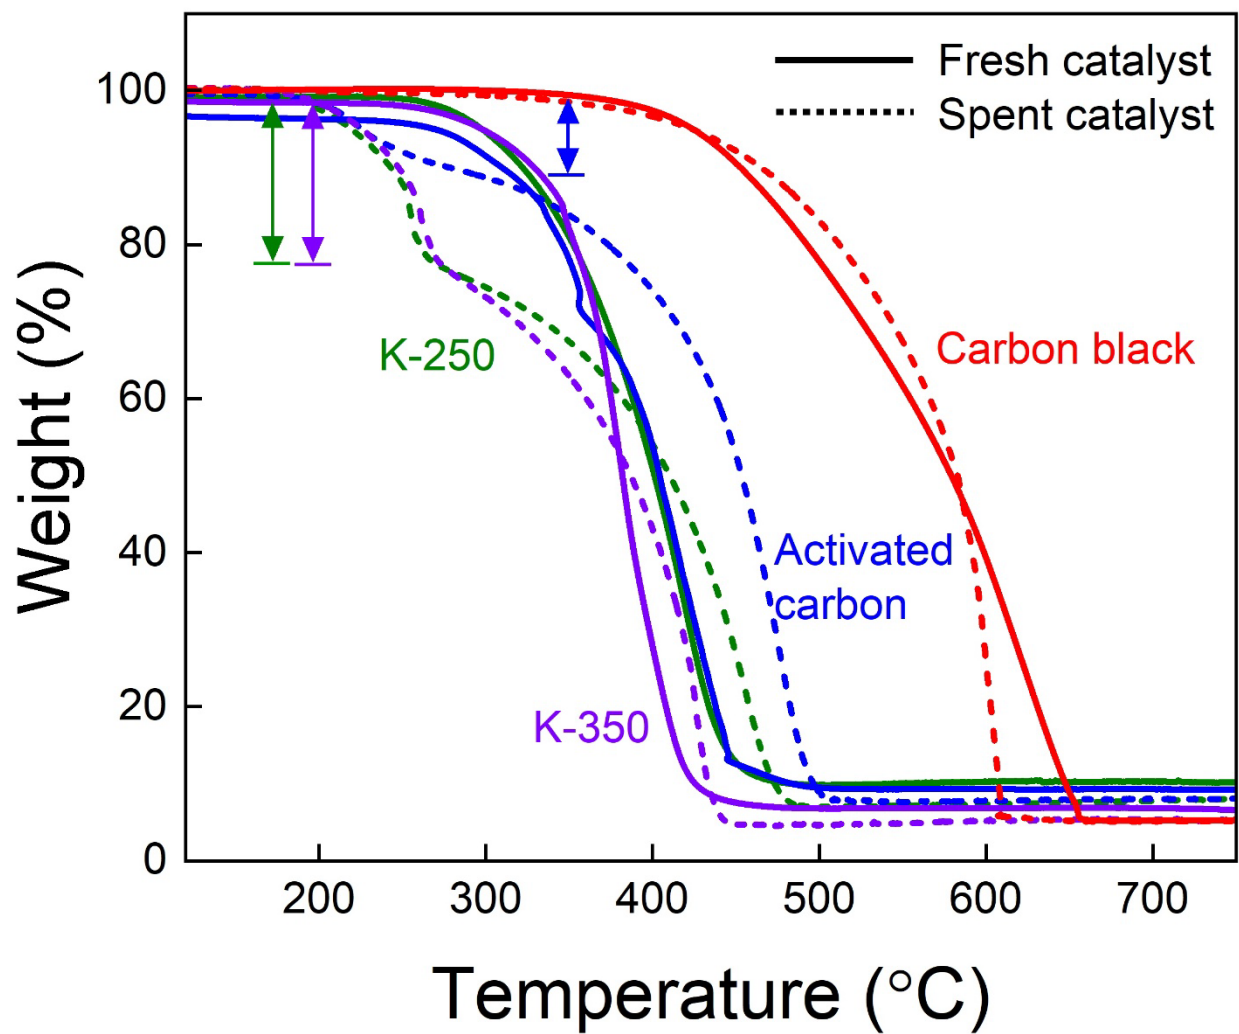

Fig. S2 Thermogravimetry results of fresh and spent catalysts.

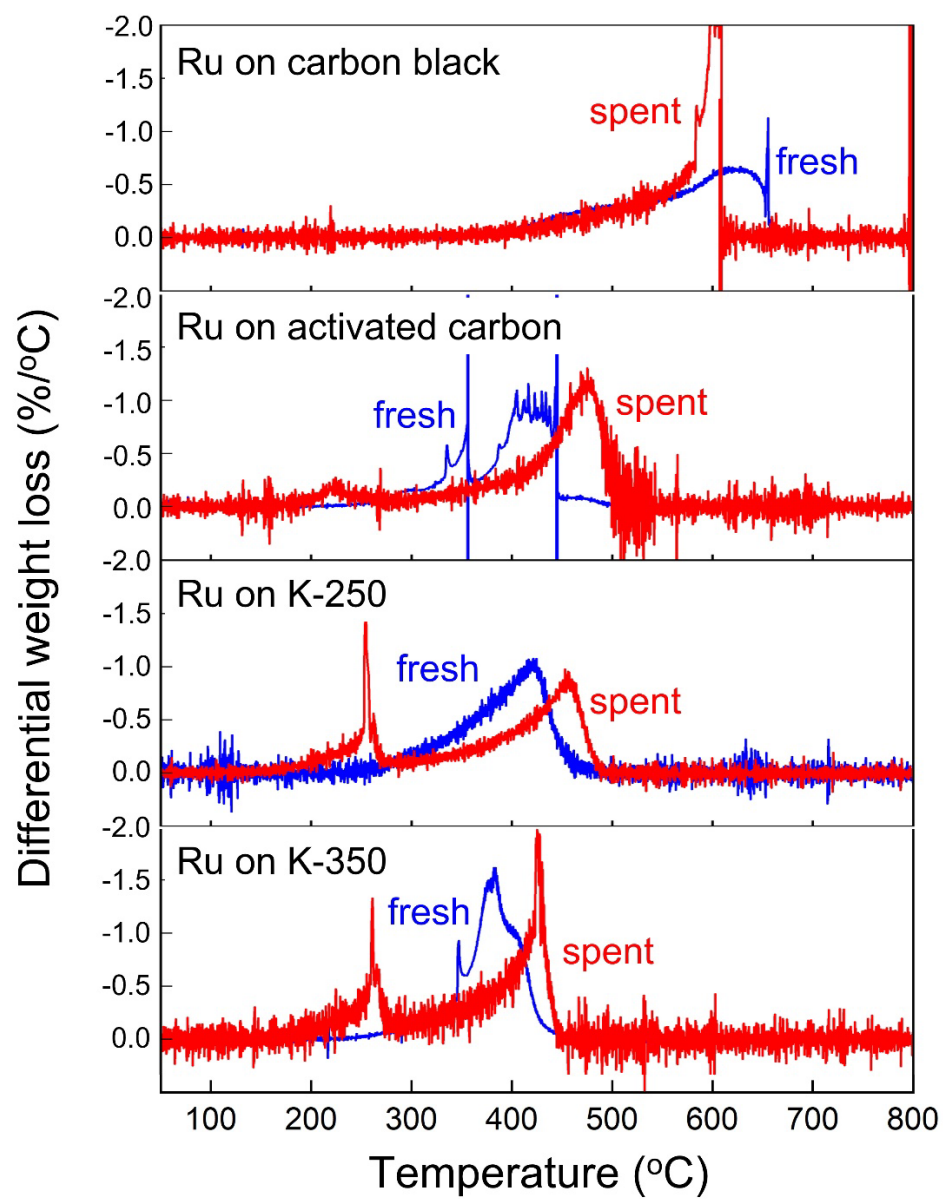

Fig. S3 Differential thermogravimetry results of fresh and spent catalysts.
